# Supplementary material
Source: PubMed Central journal article supplement (PMC4744137)
Supplement: NIHMS705514-supplement-01.pdf [file NIHMS705514-supplement-01.pdf]

1 **APPENDIX I. SUPPLEMENTAL MATERIAL**

2

3 **Subacute Limb Ischemia Induces Skeletal Muscle Injury in Genetically Susceptible Mice**  
4 **Independent of Vascular Density**

5

6 Short Title: Subacute limb ischemia induces muscle injury

7

8 Joseph M. McClung<sup>1,2,#</sup>, Timothy J. McCord<sup>3</sup>, Kevin Southerland<sup>4</sup>, Cameron A. Schmidt<sup>1,2</sup>,  
9 Michael E. Padgett<sup>3</sup>, Terence E. Ryan<sup>1,2</sup>, and Christopher D. Kontos<sup>3,5</sup>

10

11 <sup>1</sup>Department of Physiology and <sup>2</sup>Diabetes and Obesity Institute, East Carolina University, Brody  
12 Medical Center, Greenville, NC.

13 <sup>3</sup>Division of Cardiology, Department of Medicine; <sup>4</sup>Division of General Surgery, Department of  
14 Surgery; <sup>5</sup>Department of Pharmacology and Cancer Biology, Duke University Medical Center,  
15 Durham, NC.

16

17 #Correspondence should be addressed to:

18 JMM: Diabetes and Obesity Institute, Office #4109, Mail Stop 743, East Carolina Heart Institute,  
19 Brody School of Medicine at East Carolina University, 115 Heart Drive, Greenville, NC 27834-  
20 4354. Tel: 252-737-5034 (office); Fax: 252-744-3460; email: [mcclungj@ecu.edu](mailto:mcclungj@ecu.edu)

21

22

## 1 **Materials and Methods**

2 *Animals.* Experiments were conducted on adult C57/BL6 (N=51) or BALB/c (N=58). All mice  
3 were  $\geq 12$  weeks old the study was approved by the Institutional Review Committees of Duke  
4 University Medical Center or East Carolina University. All animal care complied with the *Guide*  
5 *for the Care and Use of Laboratory Animals*, Institute of Laboratory Animal Resources,  
6 Commission on Life Sciences, National Research Council. Washington: National Academy  
7 Press, 1996.

8 *Animal Models of Ischemic Peripheral Artery Disease.* Mice were anesthetized by intraperitoneal  
9 injection of ketamine (90 mg/kg) and xylazine (10 mg/kg). Acute hindlimb ischemia (ALI)<sup>1</sup> was  
10 induced by ligation and transection of the femoral artery proximally inferior to the inguinal  
11 ligament and immediately proximal to the superficial caudal epigastric artery, and distally  
12 immediately proximal to the bifurcation of the popliteal and saphenous arteries. Subacute limb  
13 ischemia (SLI) was performed by placement of ameroid constrictors (ACs) on the femoral artery  
14 as described further below. The ameroid constrictors (0.25mm internal diameter, Research  
15 Instruments SW, Escondido, CA) have been described previously<sup>2,3</sup> and consist of a stainless  
16 steel sheath surrounding a hygroscopic casein ring. ACs were sterilized with ethylene gas, and  
17 were used to induce ischemia in one of two ways: 1) An AC was placed on both the proximal  
18 and distal femoral artery (2AC model) in a modification of the approach described previously by  
19 Yang et al<sup>3</sup>. The proximal ameroid constrictor was placed around the femoral artery, inferior to  
20 the inguinal ligament and immediately proximal to the superficial caudal epigastric artery, and  
21 the distal ameroid constrictor was placed immediately proximal to the bifurcation of the popliteal  
22 and saphenous arteries; 2) A single AC was placed on the femoral artery immediately proximal  
23 to the origin of the superficial caudal epigastric artery (1AC model). To minimize the potential

1 for acute ischemia, the inferior epigastric, lateral circumflex, and superficial epigastric artery  
2 branches of the femoral artery were left intact in all models (ALI, 2AC, 1AC), thereby  
3 preserving collateral perfusion to the limb. Mice were closely monitored during the postoperative  
4 period, and perfusion in the ischemic and contralateral non-ischemic limbs was measured  
5 immediately after surgery and at the indicated times afterwards up to 4 weeks post-operatively.  
6 The extent of necrosis, if any, in ischemic limbs was recorded post-operatively using the  
7 previously described semi-quantitative scale <sup>1</sup>: grade 0, no necrosis in ischemic limb; grade I,  
8 necrosis limited to toes; grade II, necrosis extending to dorsum pedis; grade III, necrosis  
9 extending to crus; and grade IV, necrosis extending to mid-tibia or complete limb necrosis. For  
10 limb necrosis, each animal is scored by a blinded investigator at each time point and all scores  
11 are assigned across each model by the same blinded investigator.

12 *Assessment of Limb Perfusion.* To determine blood flow recovery after AC-induced subacute  
13 femoral artery occlusion, laser Doppler perfusion image (LDPI) scanning was performed on  
14 animals placed on a warming pad in the supine position after anesthesia, using a Moor  
15 Instruments LDI2-High Resolution (830nm) System (Moor, Axminster, UK) up to 28 days  
16 postoperatively. Images were analyzed with the MoorLDI™ Image Review software. Results  
17 were expressed as the ratio of perfusion in the ischemic to the non-ischemic hind limb/paw.

18 *Primary Antibodies and Materials.* The following commercial antibodies were used: tubulin  
19 (Santa Cruz), CD31 (AbdSerotec MCA-1364), SMA (DAKO, 1A4), dystrophin (Thermo  
20 Scientific RB-9024), dystrophin (MANDYS1 3B7, Developmental Studies Hybridoma Bank,  
21 Iowa City, IA), and macrophages (Mac-1: MCA519G, Serotec, Raleigh, NC).

22 *Histological Analysis.* Skeletal muscle morphology, vessel density, and markers of muscle  
23 regeneration were assessed by standard light microscopy and immunofluorescence microscopy.

1 The femoral artery around AC placement was isolated at sacrifice and frozen in liquid nitrogen  
2 cooled isopentane for sectioning. Eight- $\mu\text{m}$ -thick transverse sections were cut from mouse TA  
3 muscle, frozen in liquid nitrogen-cooled isopentane in optimum cutting temperature (OCT)  
4 medium. Sections were allowed to come to room temperature and were either stained with  
5 hematoxylin and eosin using standard methods or fixed and permeabilized with ice-cold acetone  
6 for 10 min at 4°C. Fixed sections were allowed to air dry for 5 min at room temperature (RT)  
7 and rehydrated in 1× PBS before blocking in 5% normal goat serum (Sigma) in 1× PBS at RT for  
8 45 min. Slides were then incubated overnight at 4°C in a primary antibody solution. Slides were  
9 then washed 3× in 1× PBS at RT and incubated for 1h at RT in the dark in a secondary solution  
10 containing a 1:250 dilution of Alexa Fluor 488-, 568-, or 633-conjugated secondary antibodies in  
11 blocking solution. Sections were then washed in the dark 3× for 5 min each with 1× PBS at RT,  
12 and slipcovers were mounted using Vectashield HardSet Mounting Medium with DAPI (Vector  
13 Labs H-1500). Images were captured using a Zeiss Axio Observer Inverted Laser Scanning  
14 Microscope (LSM) 510 utilizing the Zeiss LSM 510 software (v. 4.2) and analyzed by a blinded  
15 investigator using ImageJ software (NIH, v. 1.47v). Vessel density was expressed as the number  
16 of CD31<sup>+</sup> or SMA<sup>+</sup> cells per  $\mu\text{m}^2$  of muscle analyzed. The density of CD31<sup>+</sup> vessels was  
17 quantified as an indicator of capillary density changes in the distal limb muscle and represents  
18 capillary regression or angiogenesis. The size of SMA<sup>+</sup> vessels was also determined and  
19 expressed as the percentage of SMA<sup>+</sup> vessels per total muscle area (in  $\mu\text{m}^2$ ) analyzed. The size  
20 and density of SMA<sup>+</sup> vessels was used for the verification of changes in intermediate or arteriole  
21 density in the distal ischemic limb muscle. Macrophage immunostaining was quantified as the  
22 percentage of total TA muscle area Mac-1<sup>+</sup> by a blinded investigator using ImageJ software  
23 (NIH, v. 1.47v)

1 *Limb Muscle Morphology and Regeneration.* Sections from muscle samples were stained with  
2 H&E, and digital images were obtained at  $\times 20$  magnification for the analysis of non-contractile  
3 tissue (NCT). A 528 (22 $\times$ 24)-point grid was overlaid on 3 images from each animal, and points  
4 were analyzed for overlap with myofibers or outside of myofibers. NCT was expressed as the  
5 percentage of points overlapping non-myofiber area divided by the number of points overlapping  
6 myofibers. Total myofiber cross sectional area (CSA,  $\mu\text{m}^2$ ) was determined from  $\times 20$  images by  
7 tracing the area of approximately 300 individual fibers per animal with NIH ImageJ image  
8 analysis software. The same images were also utilized for the quantification of centralized  
9 myofiber nuclei, which were expressed as a percentage (%) of total myofibers in the same image.  
10 *Statistical Analysis.* Statistical analyses were carried out using StatPlus:mac (v. 2009) statistical  
11 analysis software, Vassarstats ([www.vassarstats.net](http://www.vassarstats.net)) or Prism 6 (v. 6.0d). Non-parametric  
12 necrosis score data are presented as proportions of mice falling within each necrosis score  
13 criteria for each strain and day. Necrosis scores between strains were compared using Mann-  
14 Whitney U tests. Fiber size distributions were compared with the  $\chi^2$  test. All other data were  
15 compared using ANOVA and Student's 2-tailed *t*-test to identify strain dependent differences in  
16 outcome measures and within strain differences in surgical limbs. In all cases,  $P < 0.05$  was  
17 considered statistically significant.

18  
19  
20  
21  
22  
23  
24  
25  
26  
27  
28  
29

1 **References:**

- 2 1. Dokun AO, Keum S, Hazarika S, Li Y, Lamonte GM, Wheeler F, et al. A quantitative  
3 trait locus (LSq-1) on mouse chromosome 7 is linked to the absence of tissue loss after  
4 surgical hindlimb ischemia. *Circulation*. 2008;117(9):1207-15.
- 5 2. Tang GL, Chang DS, Sarkar R, Wang R, Messina LM. The effect of gradual or acute  
6 arterial occlusion on skeletal muscle blood flow, arteriogenesis, and inflammation in rat  
7 hindlimb ischemia. *Journal of Vascular Surgery*. 2005;41(2):312-20.
- 8 3. Yang Y, Tang G, Yan J, Park B, Hoffman A, Tie G, et al. Cellular and molecular  
9 mechanism regulating blood flow recovery in acute versus gradual femoral artery occlusion  
10 are distinct in the mouse. *Journal of Vascular Surgery*. 2008;48(6):1546-58.

11
